# Supplementary material
Source: HighWire-hosted journal article supplement (http://www.cmaj.ca/highwire/filestream/58176/field_highwire_adjunct_files/0/proph-rambout-online_appendix.pdf)
Supplement: proph-rambout-online_appendix.pdf [file proph-rambout-online_appendix.pdf]

**Appendix 1: Search strategy to identify randomized controlled trials of prophylactic human papillomavirus (HPV) vaccination in MEDLINE database**

- |                                            |                        |
|--------------------------------------------|------------------------|
| 1. exp Papillomaviridae/                   | 21. vaccin\$.ti,ab.    |
| 2. exp Tumor Virus Infections/             | 22. or/17-21           |
| 3. exp Papillomavirus Infections/          | 23. 16 and 22          |
| 4. hpv.ti,ab.                              | 24. clinical trial.pt. |
| 5. hpv.mp.                                 | 25. randomized.ab.     |
| 6. papillomavirus.ti,ab.                   | 26. placebo.ab.        |
| 7. or/1-6                                  | 27. clinical trials/   |
| 8. exp Uterine Cervical Neoplasms/         | 28. randomly.ab.       |
| 9. exp Cervical Intraepithelial Neoplasia/ | 29. trial.ti.          |
| 10. exp Uterine Cervical Diseases/         | 30. or/24-29           |
| 11. exp Uterine Cervical Dysplasia/        | 31. animals.sh.        |
| 12. exp Sexually Transmitted Diseases/     | 32. humans/            |
| 13. exp Precancerous Conditions/           | 33. 31 not (31 and 32) |
| 14. cervi\$.ti,ab.                         | 34. 30 not 33          |
| 15. or/8-14                                | 35. 23 and 34          |
| 16. 7 and 15                               | 36. 7 and 22           |
| 17. exp Viral Vaccines/                    | 37. 36 and 34          |
| 18. exp Cancer Vaccines/                   | 38. 37 not 35          |
| 19. exp Papillomavirus Vaccines/           | 39. 23 not 35          |
| 20. exp Vaccines/                          |                        |
